# Supplementary material for: Spontaneous resolution of a new diphosphonate-functionalized polyoxomolybdate
Source: Royal Society of Chemistry journal article supplement (doi:10.1039/c0ce00104j), 2010-01-01
Supplement: c0ce00104j.pdf [file c0ce00104j.pdf]

## Spontaneous resolution of a new diphosphonate-functionalized polyoxomolybdate

Hua-Qiao Tan, Wei-Lin Chen, Ding Liu, Yang-Guang Li,\* En-Bo Wang\*

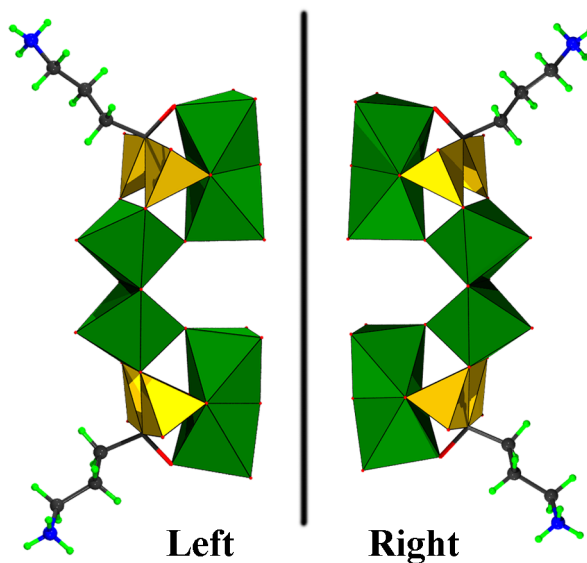

Figure S1. Polyhedral and ball-and-stick representation of polyoxoanion **1a** and **1b**.

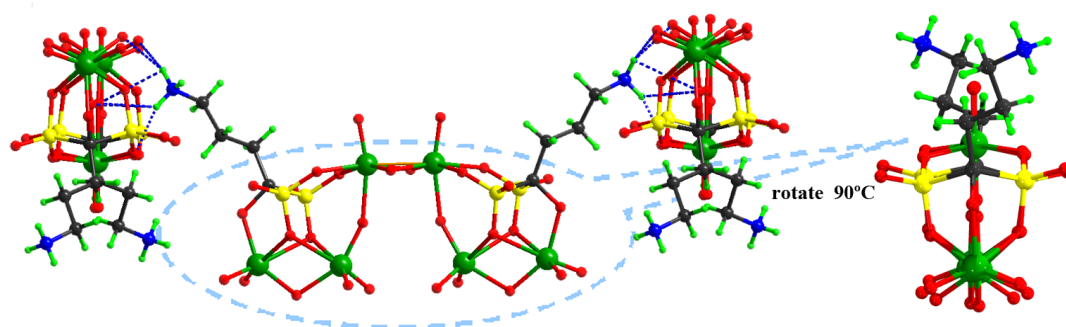

Figure S2. The “folding” of alkyls are fixed by hydrogen bonds in different direction.

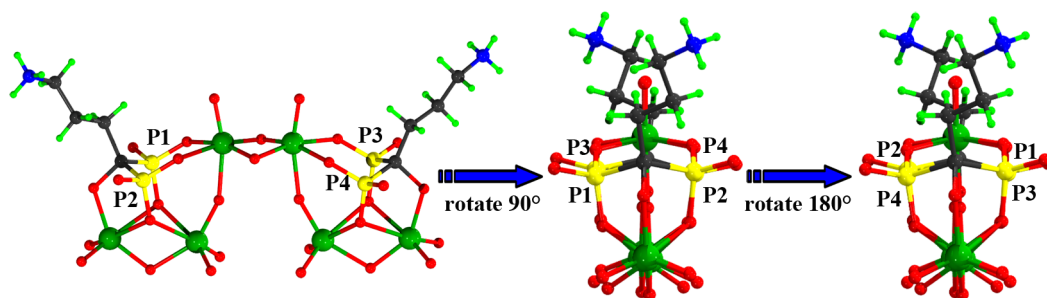

**Figure S3.** The polyoxoanion possesses a  $C_2$  symmetry.

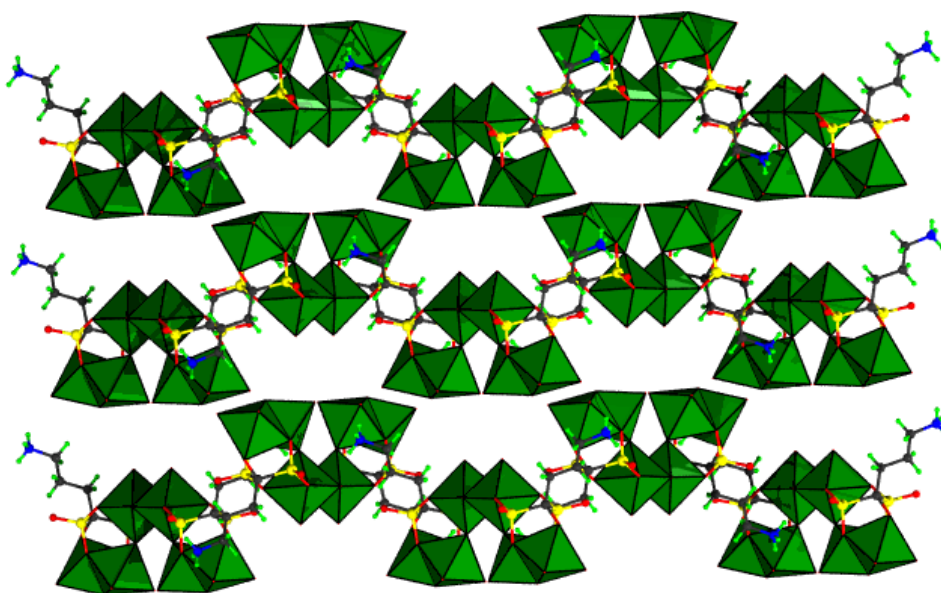

**Figure S4.** Polyhedral and ball-and-stick representation of 3D supramolecular framework in compound **1a** viewed from a axis.

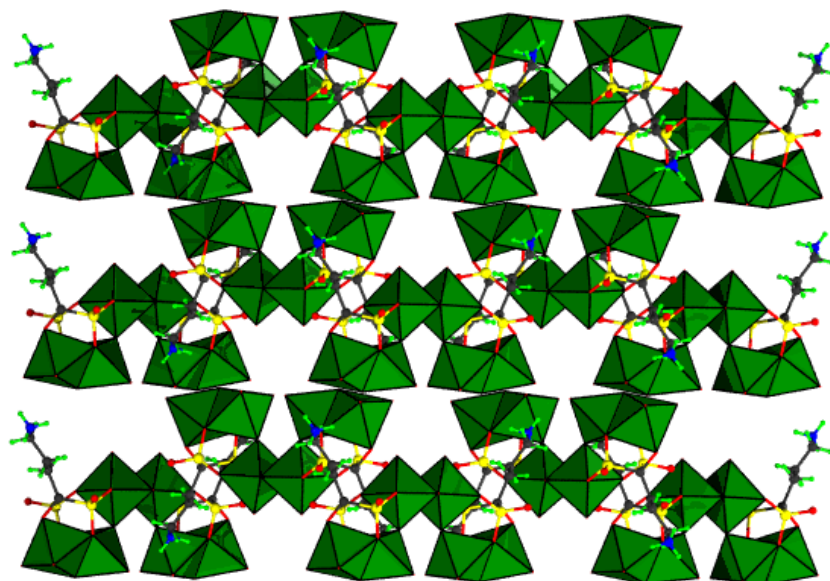

**Figure S5.** Polyhedral and ball-and-stick representation of 3D supramolecular framework in compound **1a** viewed from b axis.

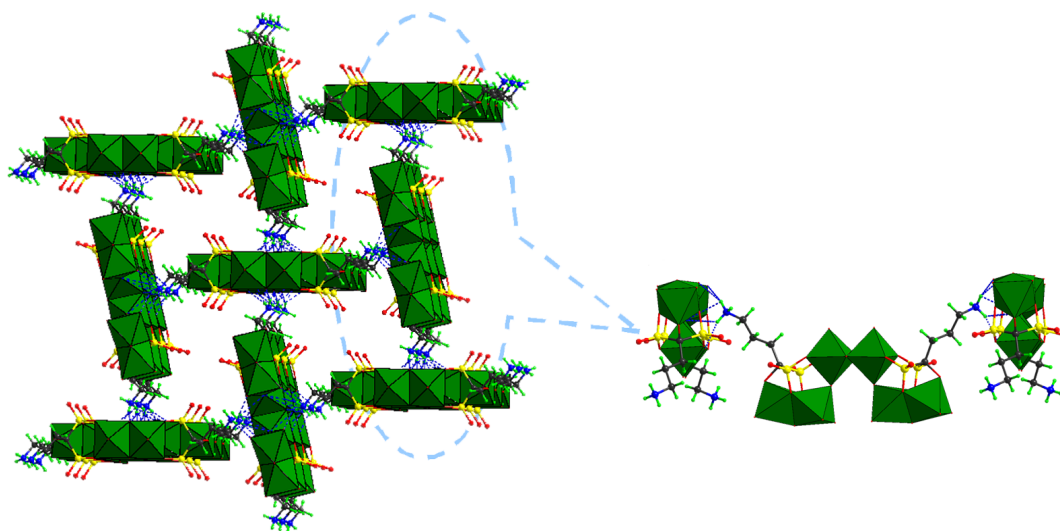

**Figure S6.** Polyhedral and ball-and-stick representation of 3D supramolecular framework in compound **1a** viewed from c axis.

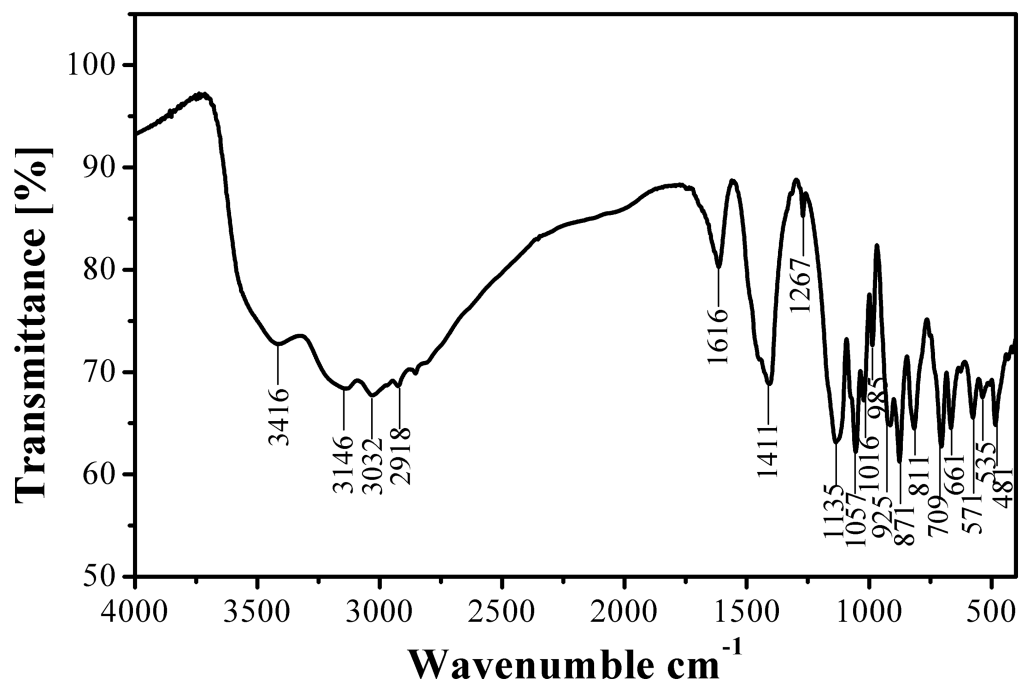

Figure S7. IR spectrum for compound 1.

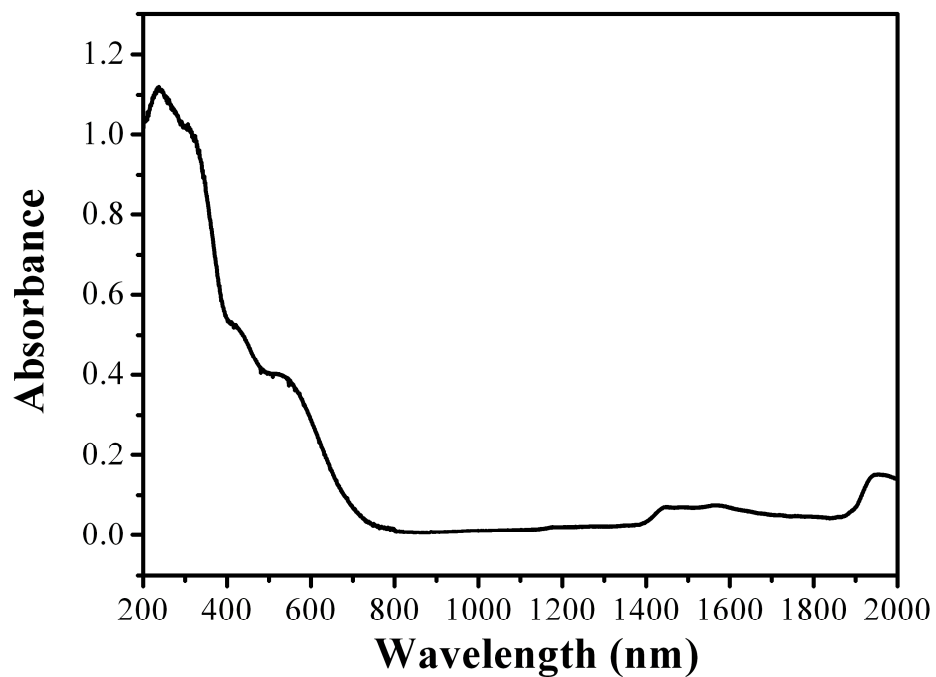

Figure S8. The UV-Vis spectrum for compound 1 in the solid state.

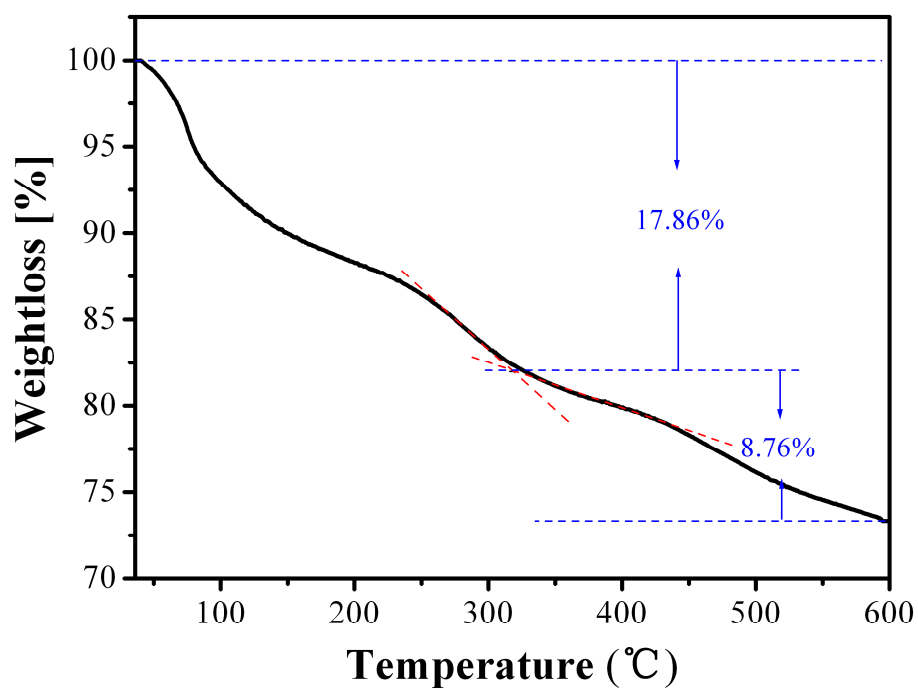

**Figure S9.** The TG curve of **1** exhibits three weight loss stages in the temperature ranges 35-600 °C. The first and second weight loss is 17.86% in the temperature range 35-330 °C, corresponding to the release of all the  $\text{NH}_4^+$  ions and lattice water molecules in **1** (17.89%). And after 330 °C, polyoxoanion **1** would be decomposed.

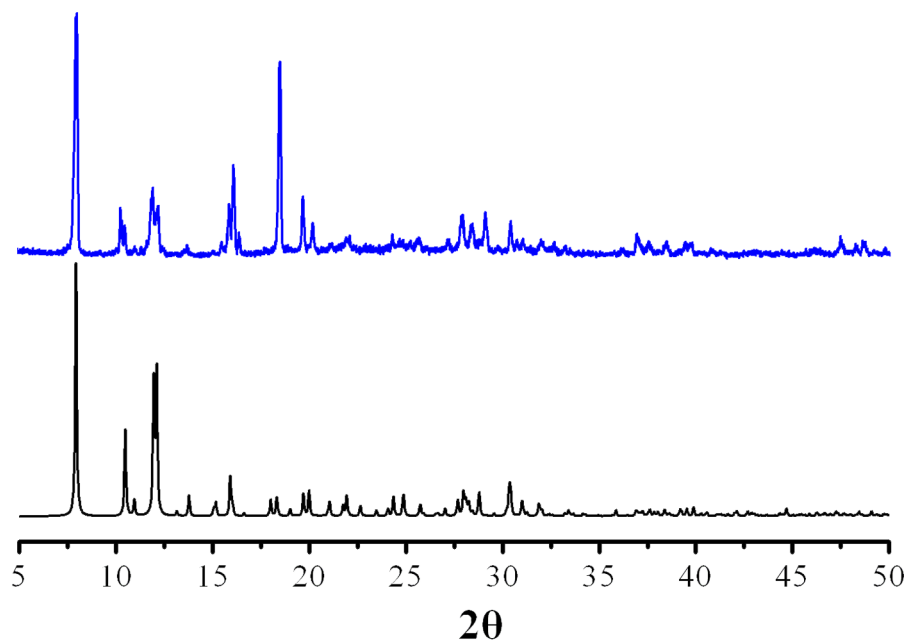

**Figure S10.** The experimental (blue) and Simulated (black) PXR D patterns of compound 1.

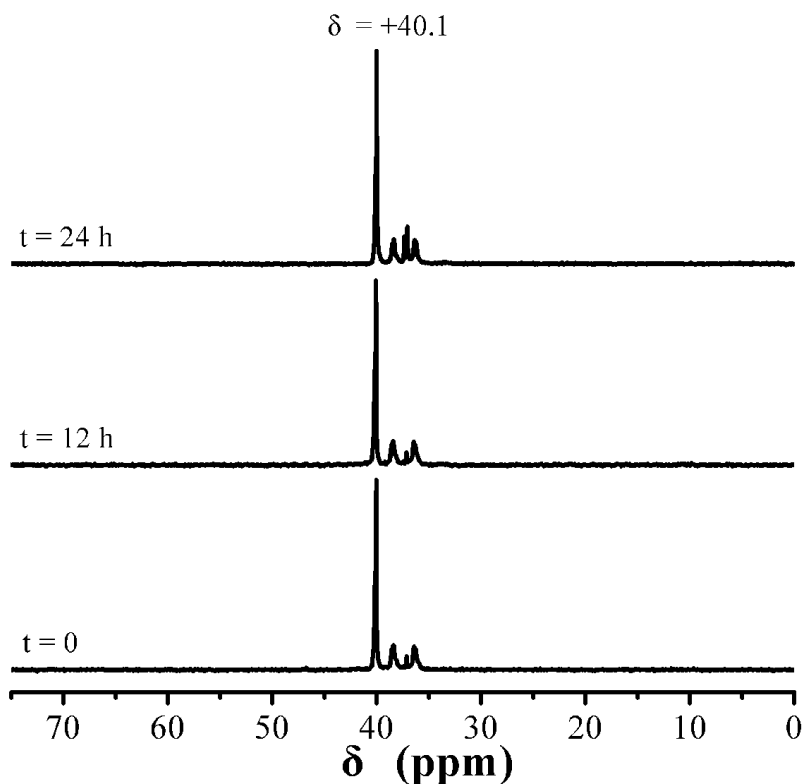

**Figure S11.** The  $^{31}\text{P}$  NMR spectra of compound **1** with time in  $\text{D}_2\text{O}$ . The  $^{31}\text{P}$  NMR spectra of compound **1** in  $\text{D}_2\text{O}$  exhibits one main signal at  $\delta = +40.1$ , which is inconsistent with the results of the solid state  $^{31}\text{P}$  NMR spectra of compound **1** (in which two resonances ( $\delta = +26.74$  ppm,  $\delta = +22.23$  ppm) with almost equal relative intensity were exhibited). This means P1, P2, P3 and P4 in polyoxoanion **1** could be of the same chemical environment in  $\text{D}_2\text{O}$ . In other words, the chirality of polyoxoanion **1** can not be retained in  $\text{D}_2\text{O}$ . This restriction of “folding” alkyls induced chiral polyoxometalate can only exist in the solid state. The weak signals at  $\delta = +38.4$ ,  $\delta = +37.1$  and  $\delta = +36.3$  ppm may come from impurity or intergradation of the polyoxoanion.

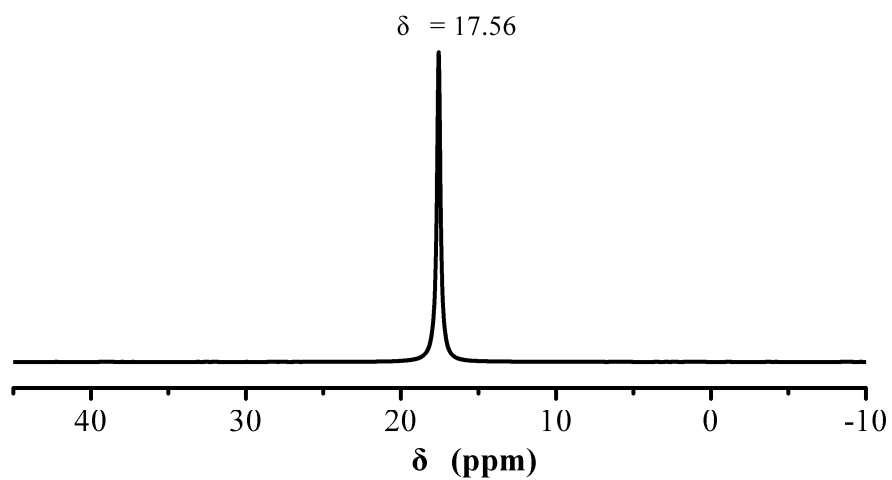

**Figure S12.** The  $^{31}\text{P}$  NMR spectrum of pure alendronic acid in  $\text{D}_2\text{O}$  at the same pH as the solutions of the title compound.



## Hydrogen bonds

Intramolecular hydrogen bonds in the polyoxoanion:

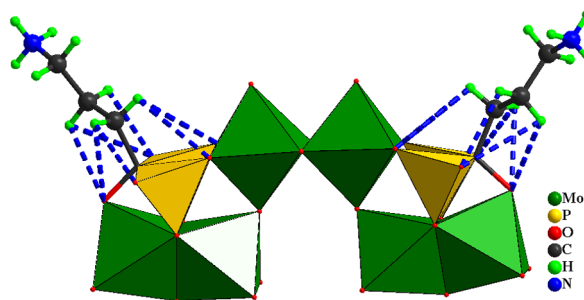

**Figure S13.** The intramolecular hydrogen bonds in the polyoxoanion. They range from 2.610 Å to 3.171 Å.<sup>1-4</sup> These hydrogen bonds help to stabilise the structure of polyoxoanion.

**Table S1.** Intramolecular hydrogen bonds in the polyoxoanion

|              |         |              |         |
|--------------|---------|--------------|---------|
| C2-H2A...O7  | 2.616 Å | C2-H2A...O13 | 2.708 Å |
| C2-H2B...O3  | 3.022 Å | C2-H2B...O12 | 3.171 Å |
| C3-H3A...O7  | 2.690 Å | C3-H3A...O10 | 2.974 Å |
| C3-H3B...O10 | 2.610 Å |              |         |

Intermolecular hydrogen bonds:

1) The intermolecular hydrogen bonds between polyoxoanions:

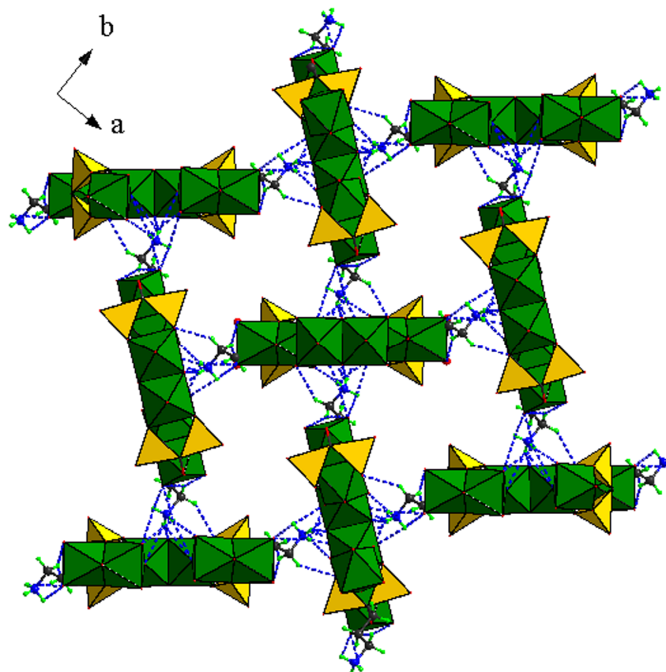

**Figure S14.** The intermolecular hydrogen bonds between polyoxoanions. The hydrogen bonds are in the range of 1.965-2.962 Å.<sup>1-4</sup> The hydrogen bonds restrict the folding alkyls of polyoxoanion in different direction, thus made the symmetry of polyoxoanion reduced from the  $C_{2v}$  (“W-shaped” structure) to  $C_2$ . Chirality of polyoxoanion have been realized. And then these hydrogen bonds linked the adjacent homochiral polyoxoanions to form a 3D homochiral supramolecular structure. Therefore, spontaneous resolution of the title chiral polyoxoanions have been observed.

**Table S2.** The intermolecular hydrogen bonds between polyoxoanions.

|              |         |              |         |
|--------------|---------|--------------|---------|
| N1–H1A···O6  | 2.010 Å | N1–H1A···O11 | 2.648 Å |
| N1–H1A···O1  | 2.962 Å | N1–H1A···O4  | 2.961 Å |
| N1–H1B···O1  | 2.682 Å | N1–H1B···O15 | 1.965 Å |
| N1–H1C···O11 | 2.835 Å | N1–H1C···O4  | 2.838 Å |
| C4–H4A···O12 | 2.882 Å | C4–H4B···O2  | 2.834 Å |
| C4–H4B···O4  | 2.789 Å | C3–H3A···O15 | 2.595 Å |

2) The intermolecular hydrogen bonds between polyoxoanions,  $\text{NH}_4^+$  and lattice water molecules:

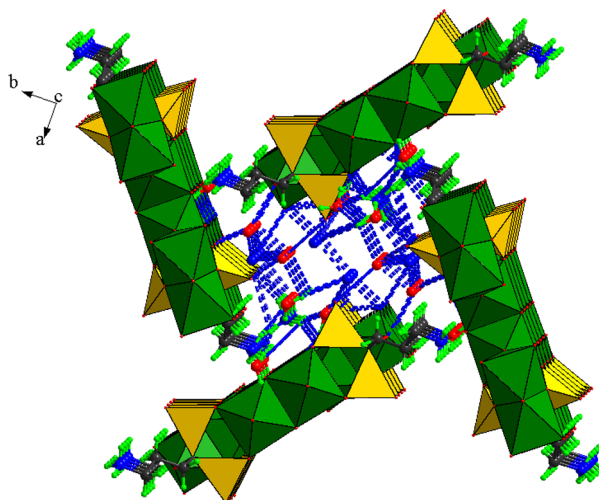

**Figure S15.** Partial intermolecular hydrogen bonds between polyoxoanions,  $\text{NH}_4^+$  and lattice water molecules. Owing to some  $\text{NH}_4^+$  and lattice water molecules disordered, partial intermolecular hydrogen bonds between polyoxoanions,  $\text{NH}_4^+$  and lattice water molecules have been studied. The hydrogen bonds are in the range of 1.770-2.975 Å.<sup>1-4</sup>  $\text{NH}_4^+$  and lattice water molecules occupy the supramolecular channels, and interact each other and polyoxoanions by hydrogen bonds to stabilise the supramolecular channels.

**Table S3.** Partial intermolecular hydrogen bonds between polyoxoanions,  $\text{NH}_4^+$  and lattice water molecules.

|               |         |               |         |
|---------------|---------|---------------|---------|
| N2–H2C···O7W  | 2.879 Å | N2–H2C···O6W  | 1.869 Å |
| N2–H2D···O10  | 2.944 Å | N2–H2E···O10  | 2.973 Å |
| N2–H2E···O7W  | 1.955 Å | N2–H2F···O10  | 1.894 Å |
| O5W–H5B···O6W | 2.933 Å | O5W–H5B···O5  | 2.678 Å |
| O5W–H5B···O2W | 2.984 Å | O5W–H5B···N4A | 2.937 Å |
| O6W–H6A···O2  | 2.426 Å | O6W–H6A···N4A | 1.770 Å |
| O6W–H6B···N2  | 2.616 Å | O7W–H7A···O14 | 2.539 Å |
| O7W–H7B···N2  | 1.975 Å |               |         |

## References

- 1 G. A. Jeffrey, *Cryst. Rev.*, 2003, **9**, 135-176.
- 2 T. Steiner, *Angew. Chem. Int. Ed.*, 2002, **41**, 48-76.
- 3 G. R. Desiraju, *Acc. Chem. Res.*, 1996, **29**, 441-449.
- 4 M. J. Calhorda, *Chem. Comm.*, 2000, 801-809.
